# Supplementary figures and images for: A multi-calibrated mitochondrial phylogeny of extant Bovidae (Artiodactyla, Ruminantia) and the importance of the fossil record to systematics
Source: Springer Nature journal article supplement (doi:10.1186/1471-2148-13-166), 2013-01-01

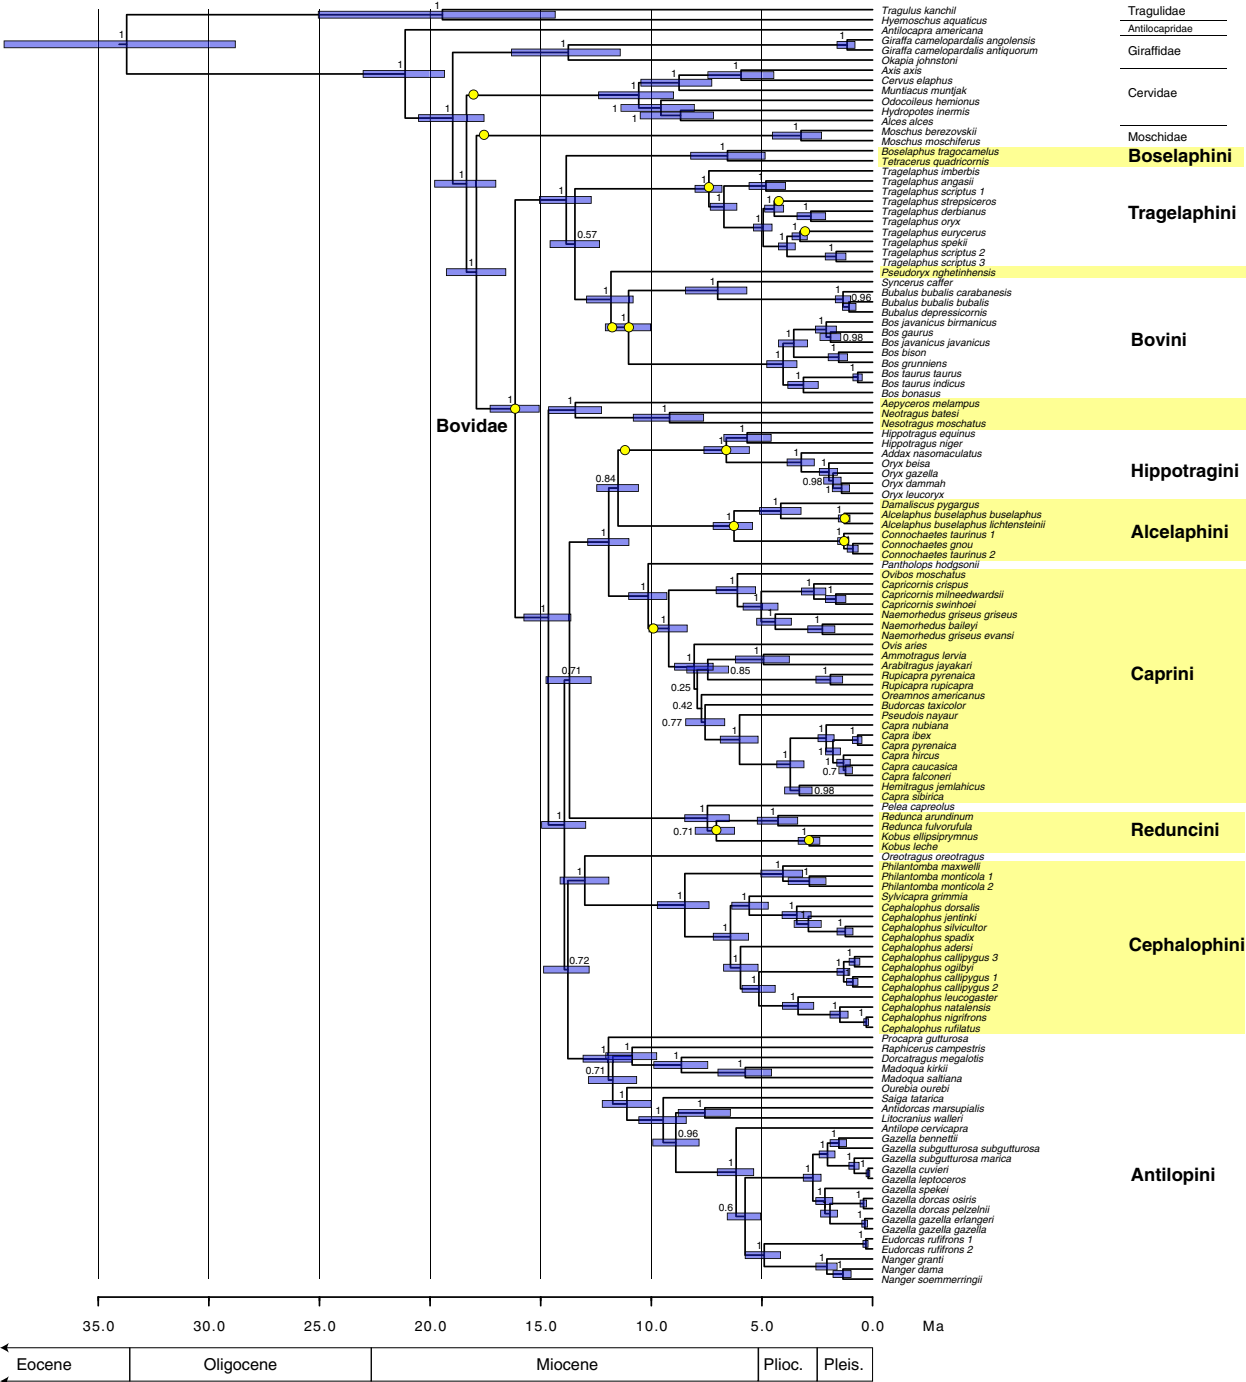

Supplement: 12862_2013_2402_MOESM4_ESM.pdf [file 12862_2013_2402_MOESM4_ESM.pdf]

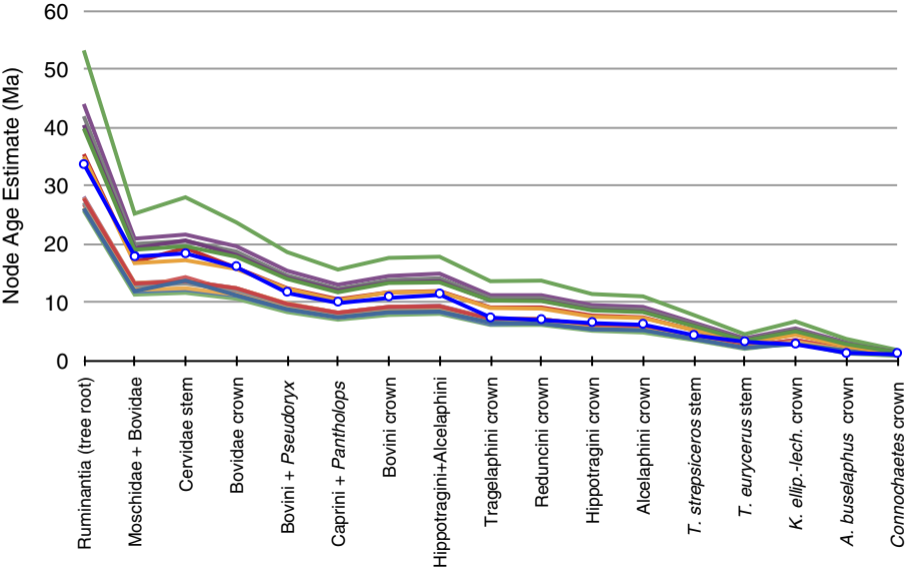

Supplement: 12862_2013_2402_MOESM5_ESM.pdf [file 12862_2013_2402_MOESM5_ESM.pdf]
